# Supplementary material
Source: ML conference proceedings conference paper supplement (https://openreview.net/forum?id=5ar8cSEiFFE)

Distance in RKHS

- Data Dependent Alg, epsilon = 0.1,  $\sigma = 3$
- Data Dependent Alg, epsilon = 0.1,  $\sigma = 30$
- Data Dependent Alg, epsilon = 1,  $\sigma = 3$
- Data Dependent Alg, epsilon = 1,  $\sigma = 30$

$10^0$

$10^{-1}$

$10^{-2}$

$10^1$

$10^2$

$10^3$

Synthetic dataset size

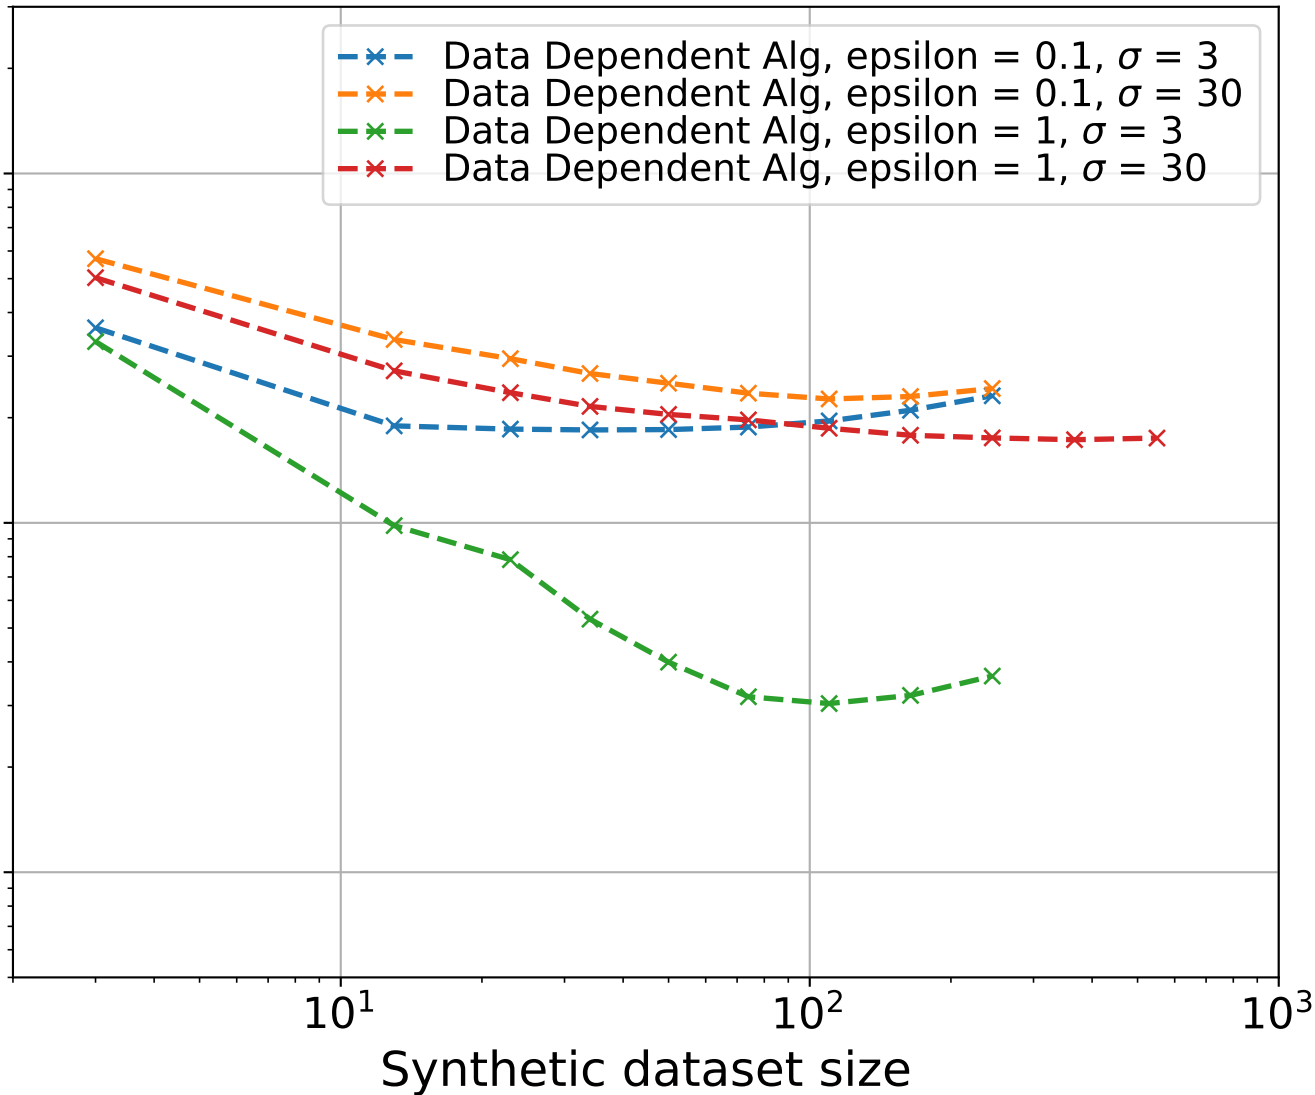

Supplement: supplementary_material [file attachment]
