# Supplementary material
Source: ML conference proceedings conference paper supplement (https://openreview.net/forum?id=5ar8cSEiFFE)

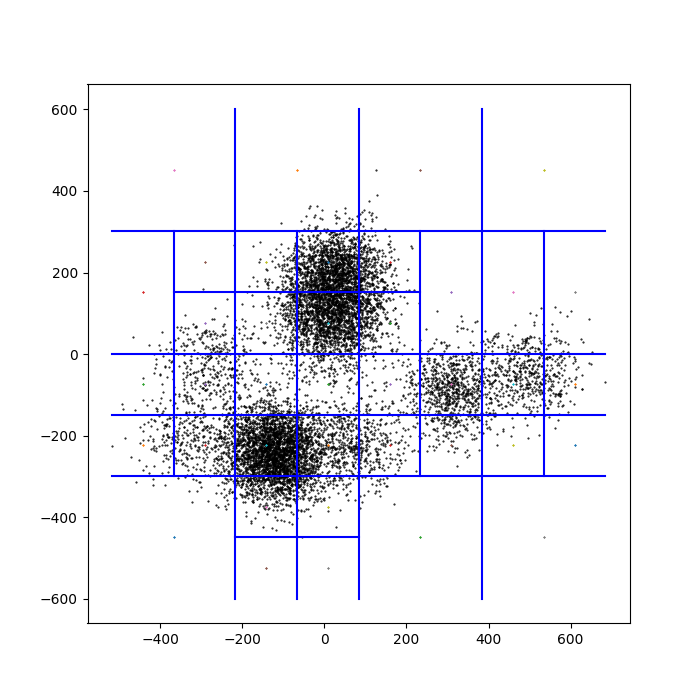

Supplement: supplementary_material [file attachment]

Distance in RKHS

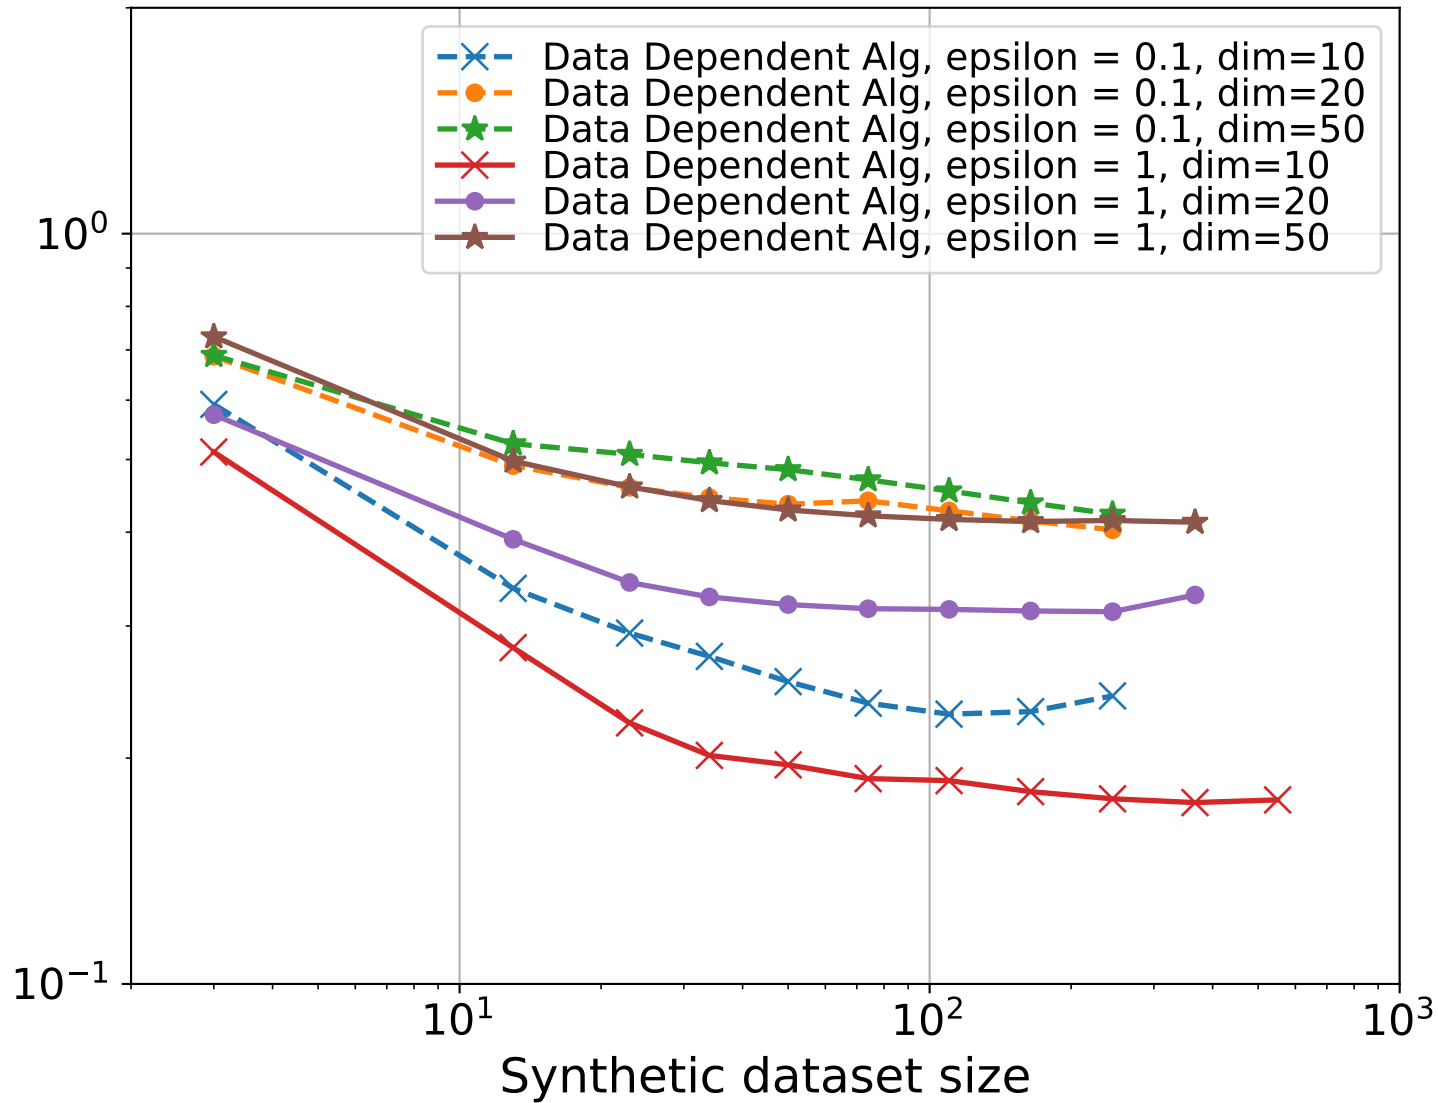

Supplement: supplementary_material [file attachment]

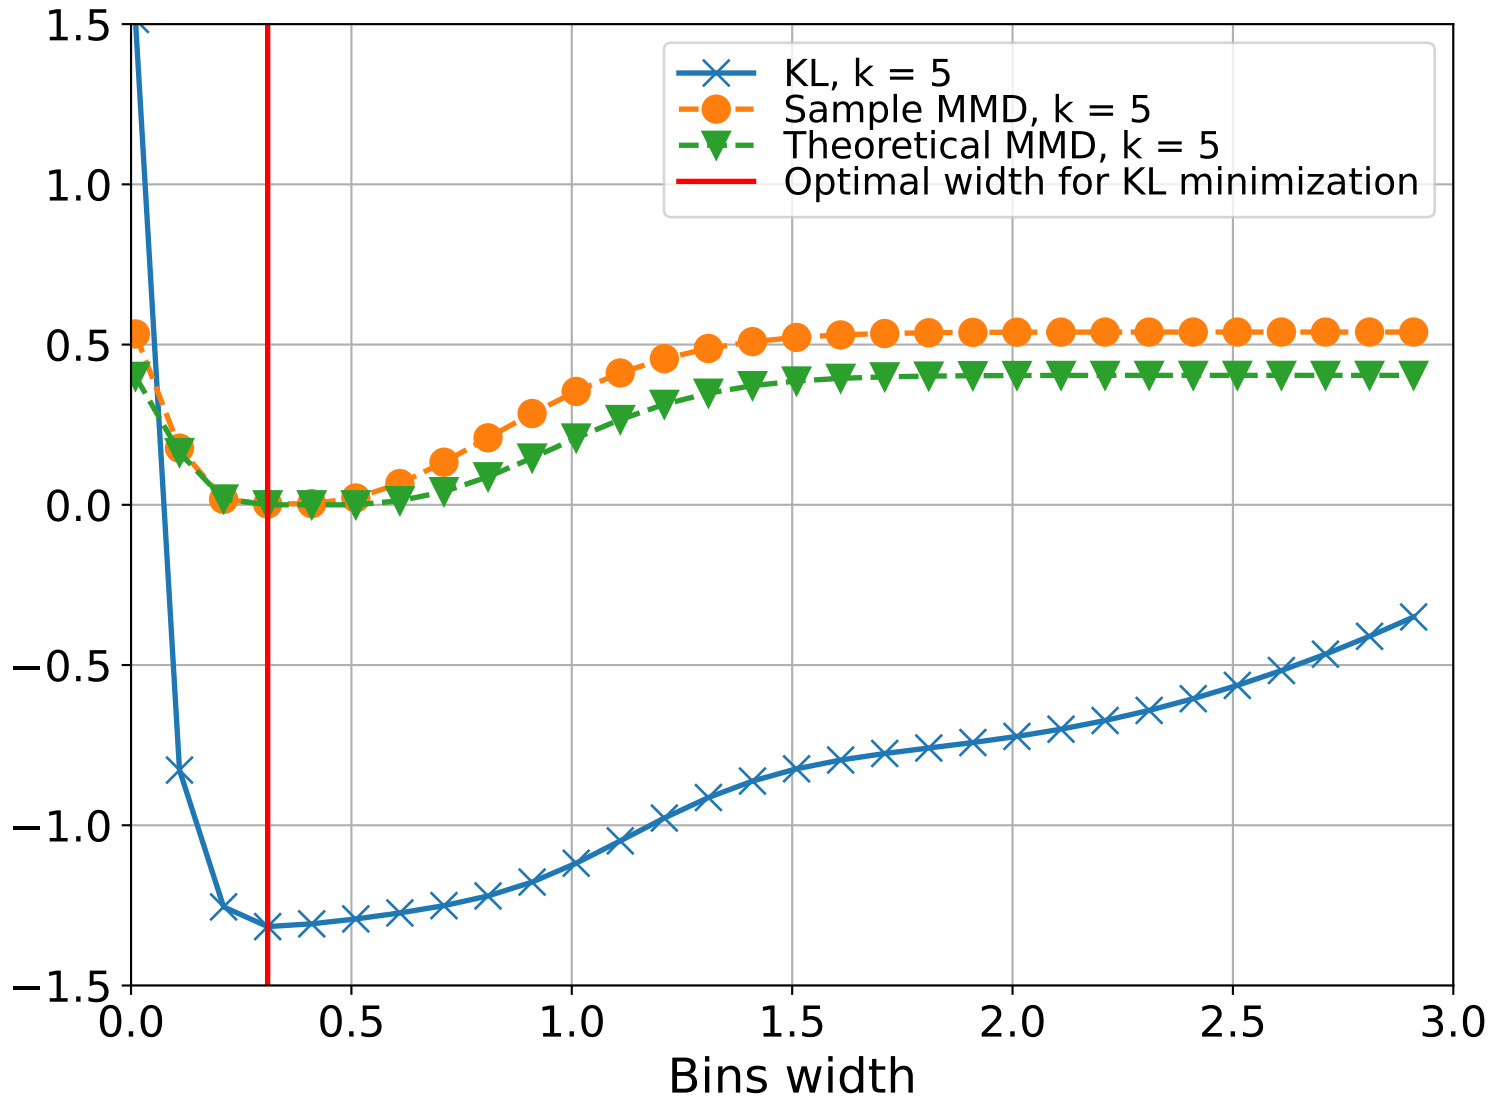

Supplement: supplementary_material [file attachment]

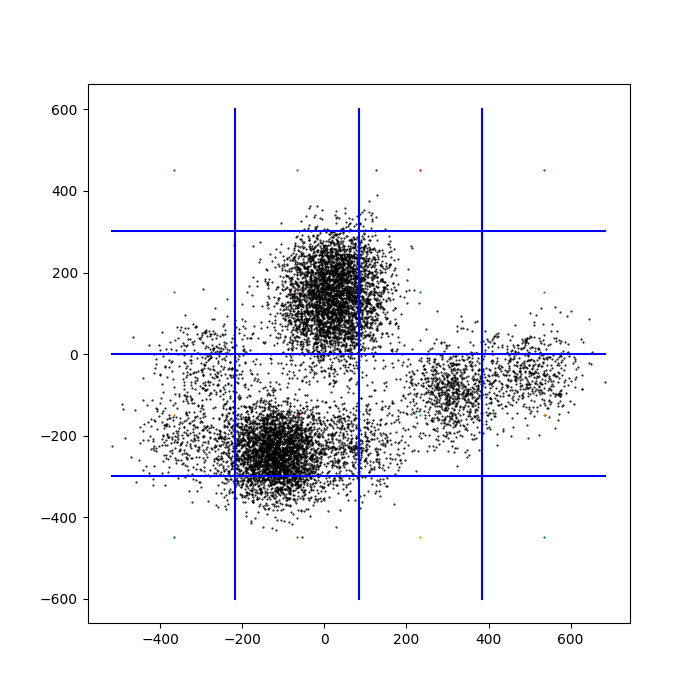

Supplement: supplementary_material [file attachment]

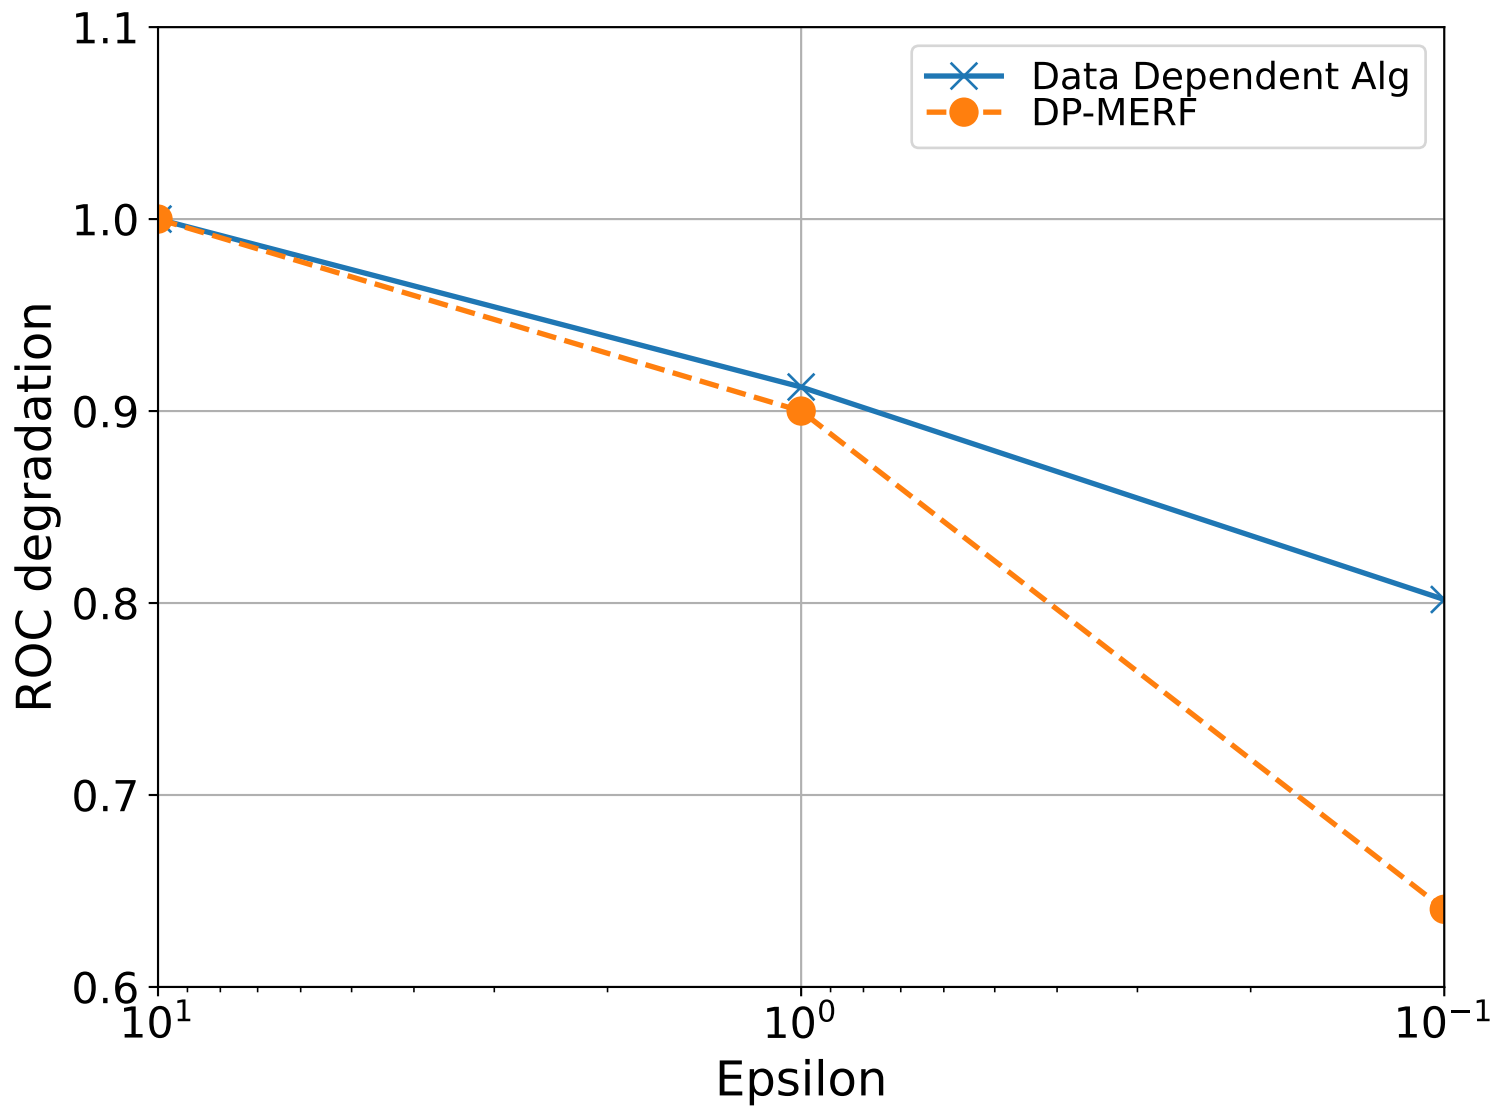

Supplement: supplementary_material [file attachment]

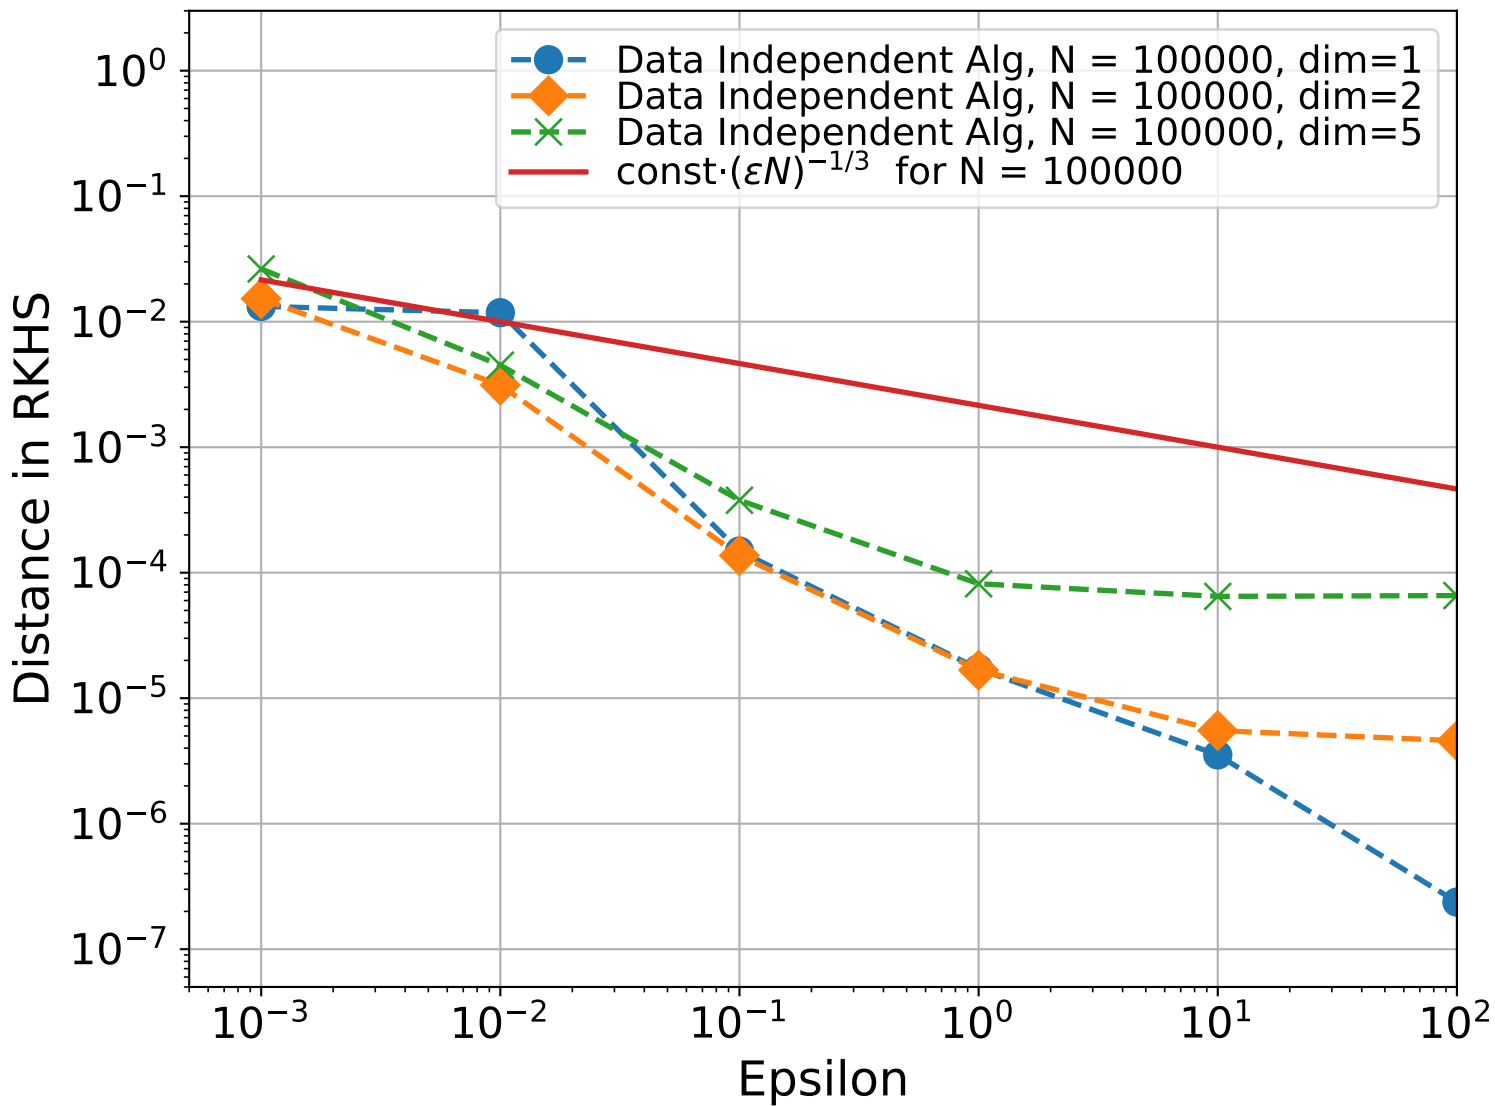

Supplement: supplementary_material [file attachment]

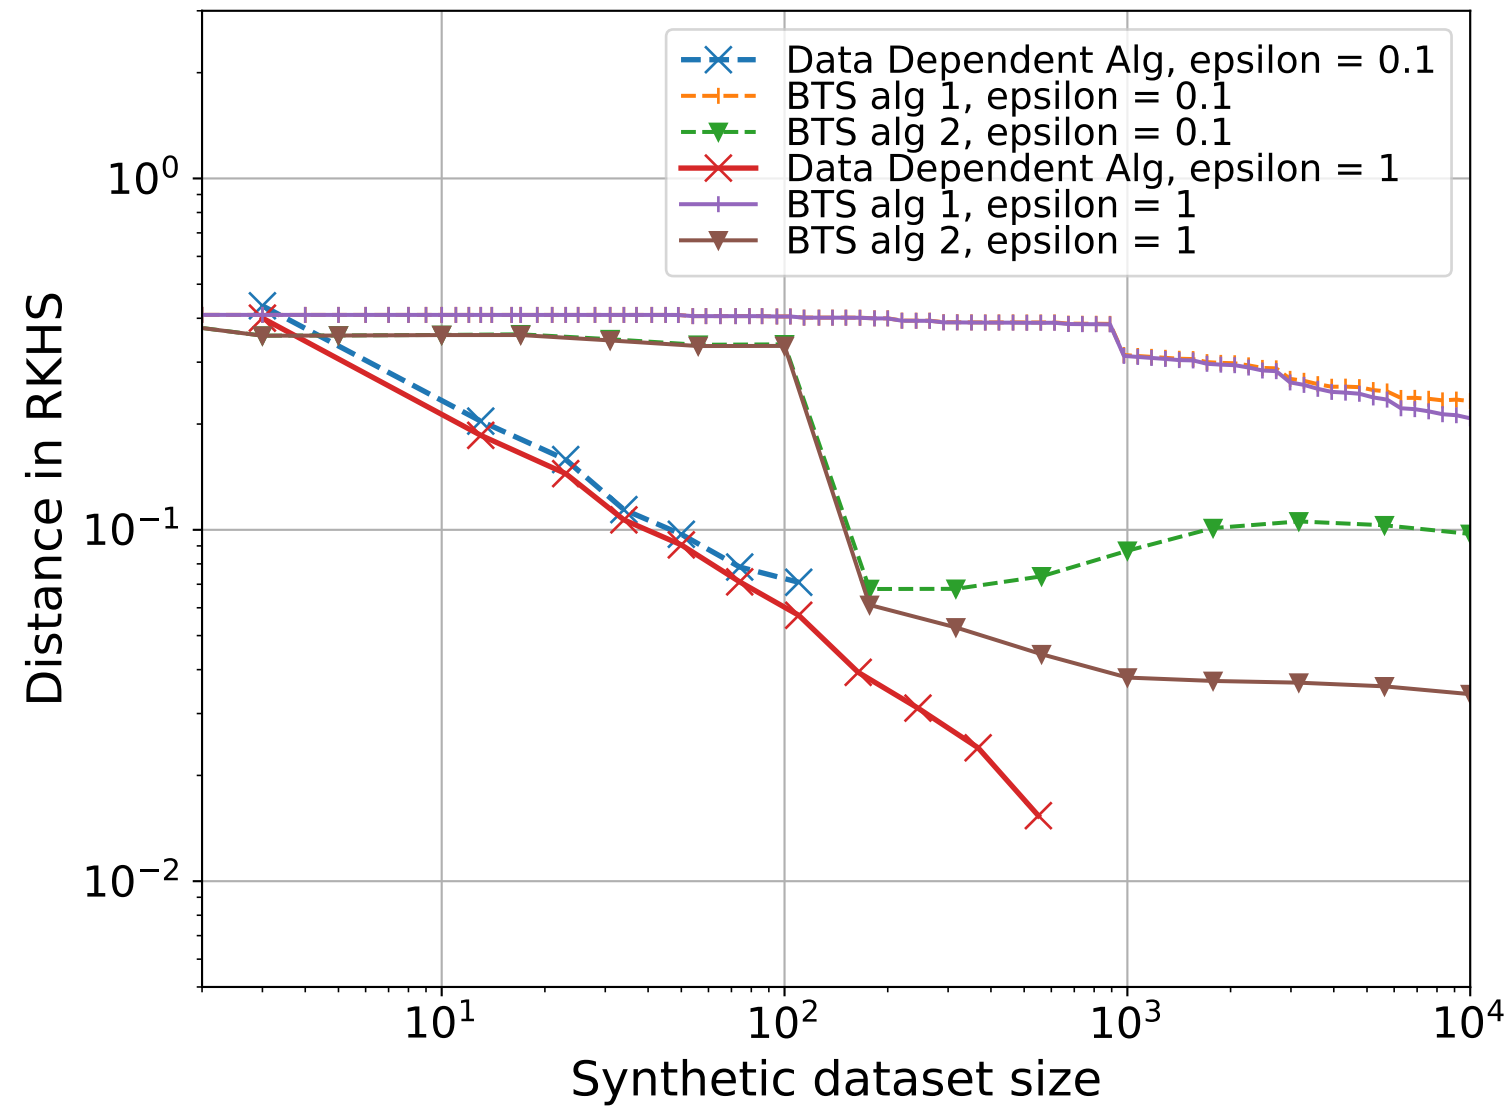

Supplement: supplementary_material [file attachment]

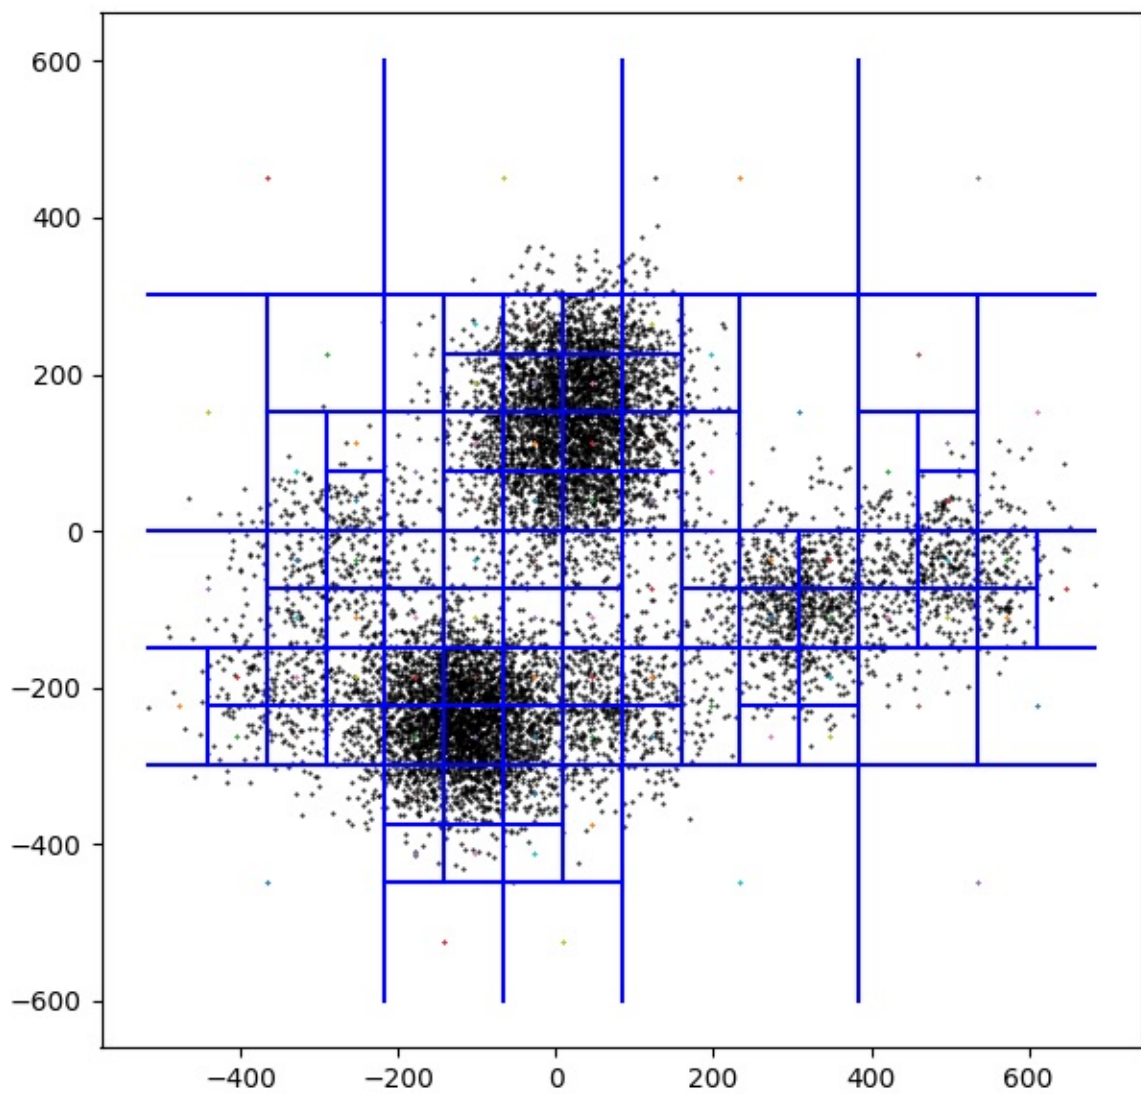

Supplement: supplementary_material [file attachment]

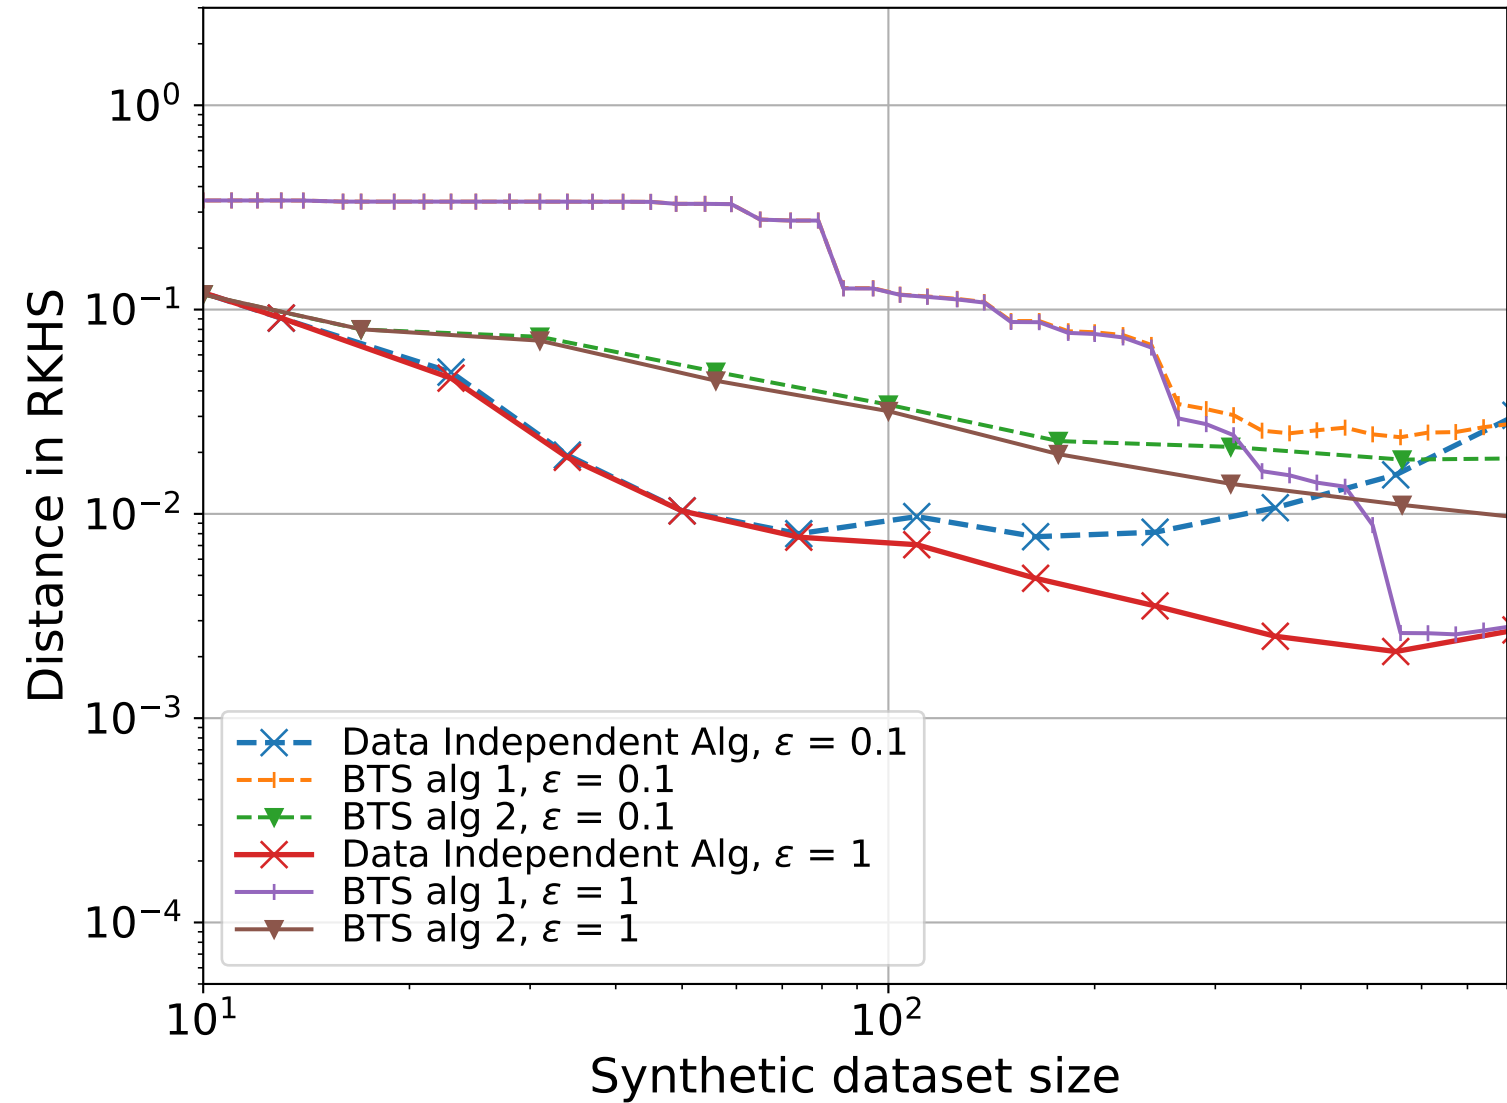

Supplement: supplementary_material [file attachment]
